# Supplementary figures and images for: The Influence of SARS-CoV-2 Pandemic on the Diagnosis of Celiac Disease and Clinical Practice in Pediatric Gastroenterology
Source: MDPI journal article supplement (doi:10.3390/nu15030559), 2023-01-21

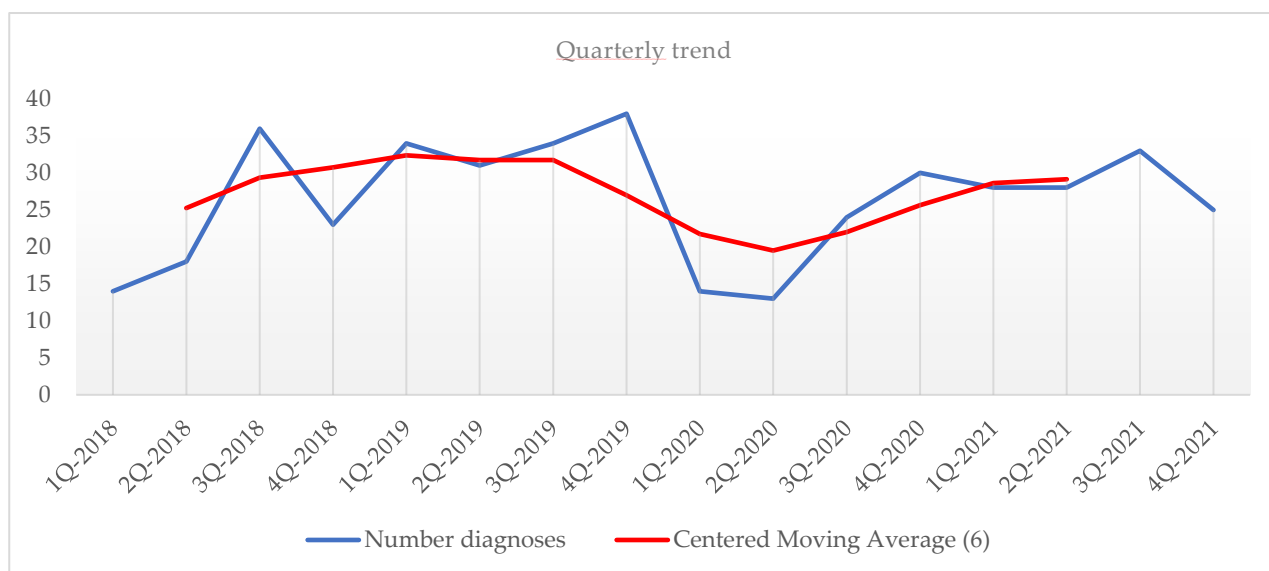

**Supplementary Figure S1.** Quarterly diagnosis rates between March 2018 and February 2022.

Supplement: s1 [file s1]
